# Supplementary material for: Risk factors for extended-spectrum beta-lactamase-producing Enterobacteriaceae infection causing septic shock in cancer patients with chemotherapy-induced febrile neutropenia
Source: Springer Nature journal article supplement (doi:10.1007/s11739-018-02015-x), 2019-01-01
Supplement: MOESM1 [file 16367950]

**Supplement Table 1.** Bacteria isolated from blood and urine cultures

| Variables | Blood cultures | Urine cultures |
| --- | --- | --- |
| Gram negative bacteria | 74 | 23 |
| *Escherichia coli* | 40 | 14 |
| ESBL (-) | 23 | 10 |
| ESBL (+) | 17 | 4 |
| *Klebsiella pneumoniae* | 15 | 5 |
| ESBL (-) | 12 | 4 |
| ESBL (+) | 3 | 1 |
| *Pseudomonas aeuroginosa* | 12 | 1 |
| *Enterobacter cloacae* | 5 | 3 |
| *Morganella morganii* | 1 | 0 |
| *Aeromonas hydrophila* | 1 | 0 |
| Gram-positive bacteria | 13 | 3 |
| *Staphylococcus aureus* | 4 | 1 |
| *Streptococcus agalactiae* | 2 | 1 |
| *Streptococcus pyogenes* | 1 | 0 |
| *Enterococcus faecium* | 1 | 1 |
| *Kocuria species* | 1 | 0 |
| Other anaerobes | 4 | 0 |
| There is no isolation in blood culture (n=92, 51.4%) and urine culture (n-153, 85.5%). | | |

Abbreviations: ESBL = extended-spectrum beta-lactamases-producing.
